# Supplementary material for: Mitochondrial dynamics and respiration within cells with increased open pore cytoskeletal meshes
Source: PubMed Central journal article supplement (PMC5769657; doi:10.1242/bio.029009), 2017-11-14

**Figure S1** illustrates the difference in net movement between the fibroblast and fibrosarcoma groups. The fibrosarcoma cell line exhibits a greater net movement when compared to the fibroblast cell line, likely due to the increase in dynamic homogeneity in the fibrofibrosarcoma cell line. Fibroblasts exposed to CytD exhibited greater net movement than fibroblast but less than the fibrosarcoma group. As net distances cannot go below zero, without lognormal distribution the distribution would be skewed to the right.

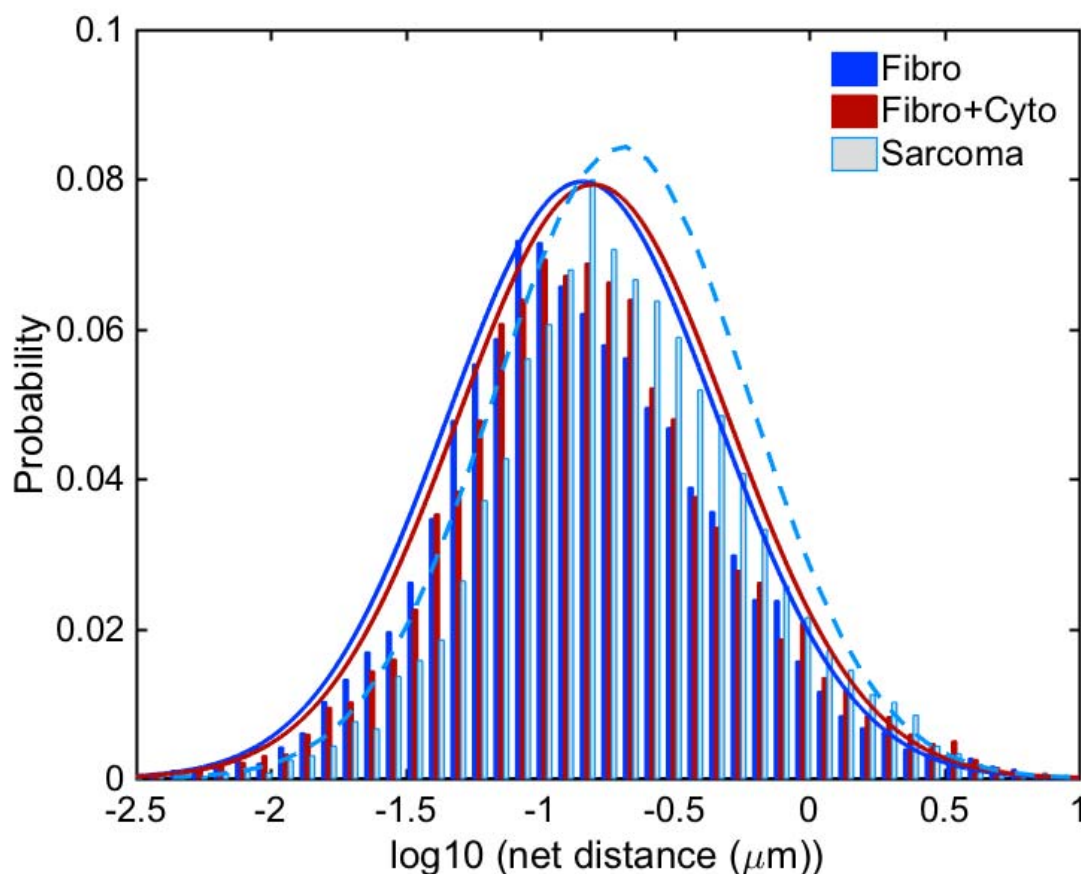

**Table S1**

P-value table for total mitochondrial distances traveled.

|            | FB | FB+cyt | FB+A23  | FB+A23+cyt | FB+noco | FS     | FS+cyt | FS+A23 | FS+A23+cyt | FS+noco | geomean<br>totdist<br>(nm) | Ave<br>velocity<br>(nm/s) |
|------------|----|--------|---------|------------|---------|--------|--------|--------|------------|---------|----------------------------|---------------------------|
| FB         | x  | -3.059 | -8.889  | -10.853    | -22.558 | 11.419 | -9.948 | -8.992 | -6.872     | -3.014  | 5224.8                     | 17.7                      |
| FB+cyt     | x  | x      | -19.642 | -15.017    | -34.858 | -6.969 | -7.343 | 12.985 | -12.723    | -9.380  | 5735.7                     | 19.1                      |
| FB+A23     | x  | x      | x       | -5.669     | -17.918 | 17.256 | 15.311 | -9.025 | -9.379     | -2.917  | 4740.8                     | 15.8                      |
| FB+A23+cyt | x  | x      | x       | x          | -40.659 | -5.932 | -3.548 | -1.499 | -1.439     | -8.387  | 5077.6                     | 16.9                      |
| FB+noco    | x  | x      | x       | x          | x       | 59.005 | 57.967 | 37.412 | -43.239    | -9.991  | 4206.9                     | 14.0                      |
| FS         | x  | x      | x       | x          | x       | x      | -0.785 | -3.151 | -2.393     | -20.772 | 5654.2                     | 18.9                      |
| FS+cyt     | x  | x      | x       | x          | x       | x      | x      | -2.538 | -1.271     | -17.474 | 5552.9                     | 18.5                      |
| FS+A23     | x  | x      | x       | x          | x       | x      | x      | x      | -0.518     | -10.800 | 5205.4                     | 17.4                      |
| FS+A23+cyt | x  | x      | x       | x          | x       | x      | x      | x      | x          | -11.832 | 5245.4                     | 17.5                      |
| FS+noco    | x  | x      | x       | x          | x       | x      | x      | x      | x          | x       | 4906.4                     | 16.4                      |

**Figure S2:** Distribution of power law diffusion exponents of mitochondria within the cell for control fibroblast and fibrosarcoma cell conditions. Both the fibroblast and fibrosarcoma cases display average power law diffusion coefficients of  $\alpha < 1$ , indicating that mitochondria are subdiffusive within the cell. In fibrosarcoma control cells, however, motion of mitochondria is closer to Brownian.

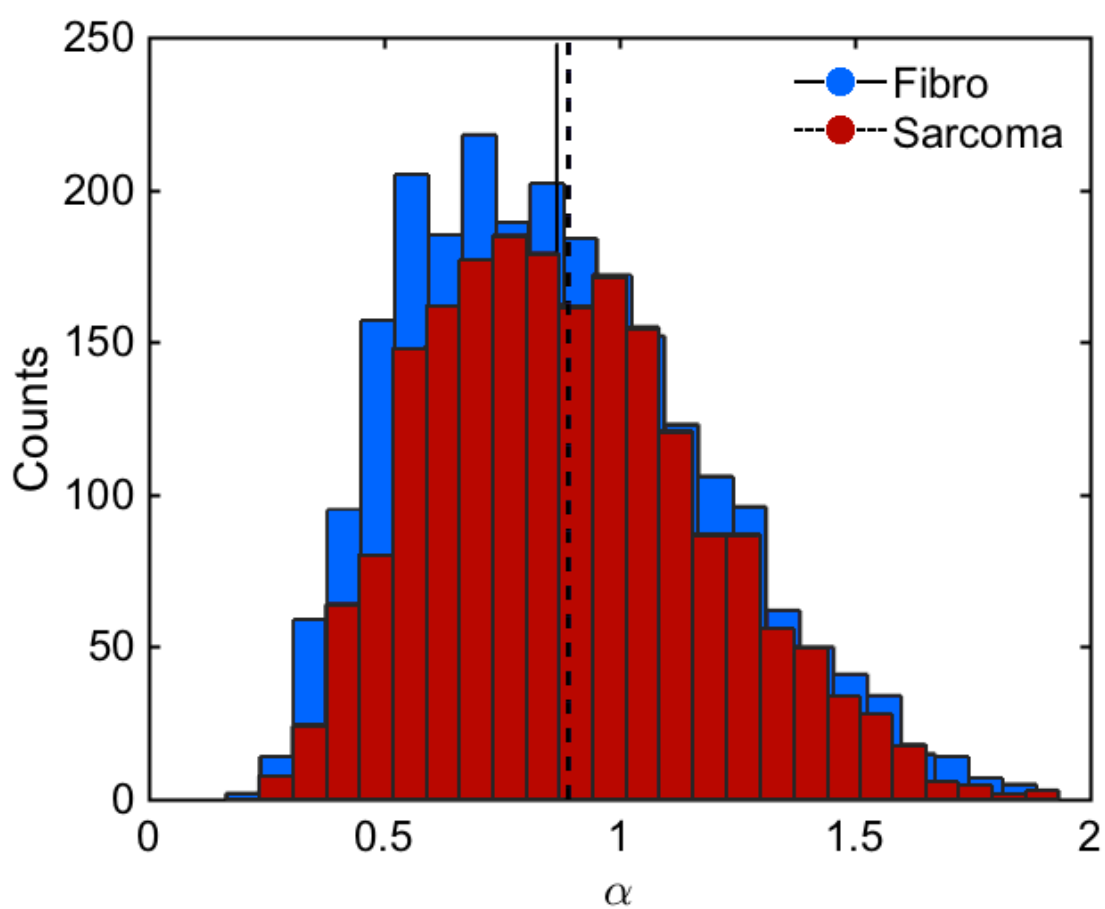

**Table S2:** Diffusion coefficients of each cell line and drug condition. Tracks that fit a power law and classified as diffusive were used to calculate the diffusion coefficient.

| Cell Type  | # tracks | Power law $r^2 > 0.7$ | Geomean(alphas) | Diffusive Tracks<br>$0.75 < \alpha < 1.25$ | Diffusion coefficient<br>( $\mu\text{m}^2/\text{s}$ ) |
|------------|----------|-----------------------|-----------------|--------------------------------------------|-------------------------------------------------------|
| FB         | 3662     | 2387                  | 0.809           | 1108                                       | 6.68E-04                                              |
| FB+cyt     | 2902     | 1867                  | 0.771           | 811                                        | 1.34E-03                                              |
| FB+A23     | 4613     | 3197                  | 0.830           | 1600                                       | 8.52E-04                                              |
| FB+A23+cyt | 5593     | 3665                  | 0.794           | 1706                                       | 1.25E-03                                              |
| FB+noco    | 3201     | 2039                  | 0.729           | 831                                        | 6.53E-04                                              |
| FS         | 2972     | 2013                  | 0.841           | 1030                                       | 1.40E-03                                              |
| FS+cyt     | 4100     | 2951                  | 0.843           | 1493                                       | 1.13E-03                                              |
| FS+A23     | 1829     | 1326                  | 0.865           | 719                                        | 1.04E-03                                              |
| FS+A23+cyt | 3294     | 2283                  | 0.825           | 1139                                       | 1.42E-03                                              |
| FS+noco    | 2810     | 1930                  | 0.867           | 885                                        | 7.19E-03                                              |

**Figure S3:** **SUIT** is the abbreviation for **S**ubstrate-**U**ncoupler-**I**nhibitor **T**itration. SUIT protocols are used with mitochondrial preparations to study respiratory control in a sequence of coupling and substrates states induced by multiple titrations. We used a standard sequence of injections consisting of oligomycin (Omy), CCCP (U), rotenone (Rot), and antimycin (Ama) to study key parameters in mitochondrial respiration.

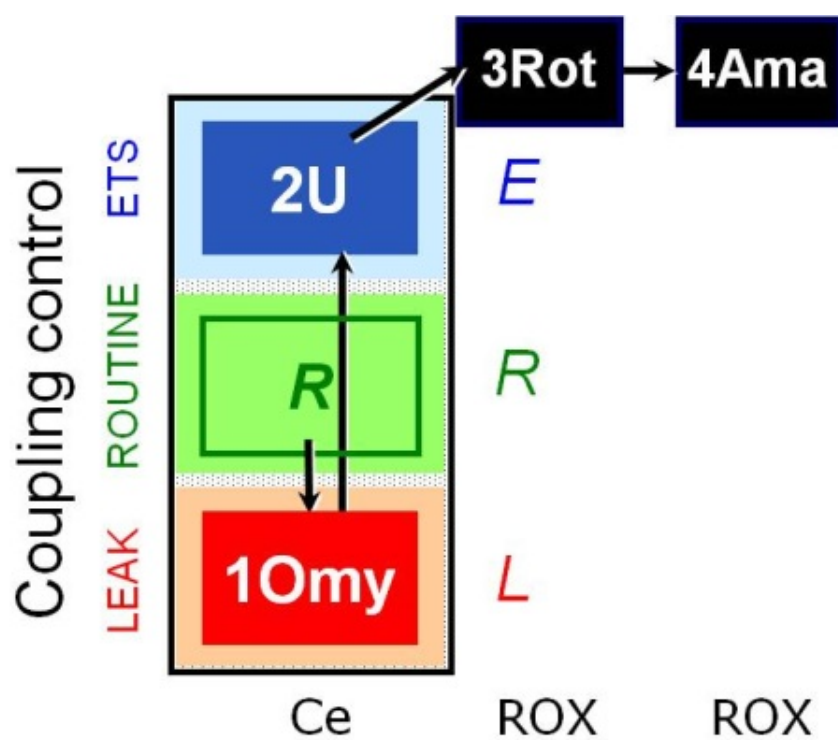

Supplement: biolopen-6-029009-s1.pdf [file biolopen-6-029009-s1.pdf]
